# Supplementary material for: A balanced nature: biodiversity, feasibility and stability in competitive ecosystems
Source: Research Square preprint supplement (doi:10.21203/rs.3.rs-6751180/v1), 2025-09-19
Supplement: Supplementary file 1 [file a90948b9481d7e9bcdfa4a83.docx]

**Description of Additional Supplementary Files**

**File name: Supplementary Video 1**

**Description: The eigenvalues of the interaction matrix as the number of species increases.**

**Legend:** The movie shows the opposite of the eigenvalues of the interaction matrix ***A*** (eigenvalues times -1). They lie approximately inside the Girko circle (black, thin circle) and which expands with the number of species. An interaction matrix of size *n*+1 is constructed by adding interaction coefficients, with interspecific interaction coefficients drawn from *N*(*m*, *s2*), to a interaction matrix of size *n*. The dots representing the eigenvalues are green when the equilibrium is stable and feasible and blue when the equilibrium is not feasible. The green circle is centered on (-1+*m*, 0) with diameter so that equation (2) is at approximate equality when the green circle meets the Girko circle. In half the simulations the feasibility is lost when the two circles meet. This happens well before the real part largest eigenvalue of the interaction matrix turns positive*, i.e.* when it crosses the red line situated on the imaginary axis. Parameters: *m* =0.5, *s* =0.015, *r* =0.
